# Supplementary material for: Eu(iii), Tb(iii) activated/co-activated K2NaAlF6 host array: simultaneous approach for improving photovoltaic efficiency and tricolour emission
Source: Royal Society of Chemistry journal article supplement (doi:10.1039/d1nj04836h), 2021-11-22
Supplement: d1nj04836h1.pdf [file d1nj04836h1.pdf]

**Table S1:** Refinement and lattice parameters of  $K_2NaAlF_6$  phosphor.

| Parameters         | $K_2NaAlF_6$ phosphor                                                                                                                                         |
|--------------------|---------------------------------------------------------------------------------------------------------------------------------------------------------------|
| Crystal system     | Cubic                                                                                                                                                         |
| Space Group        | Fm-3m                                                                                                                                                         |
| V                  | $535.11 \text{ \AA}^3$                                                                                                                                        |
| Lattice Parameters | a = $8.1154 \text{ \AA}$<br>b = $8.1154 \text{ \AA}$<br>c = $8.1154 \text{ \AA}$<br>$\alpha = 90.00^\circ$<br>$\beta = 90.00^\circ$<br>$\gamma = 90.00^\circ$ |
| $R_{exp}$          | 12.83                                                                                                                                                         |
| $R_p$              | 10.22                                                                                                                                                         |
| $R_{wp}$           | 17.51                                                                                                                                                         |
| $\chi^2$           | 2.82                                                                                                                                                          |

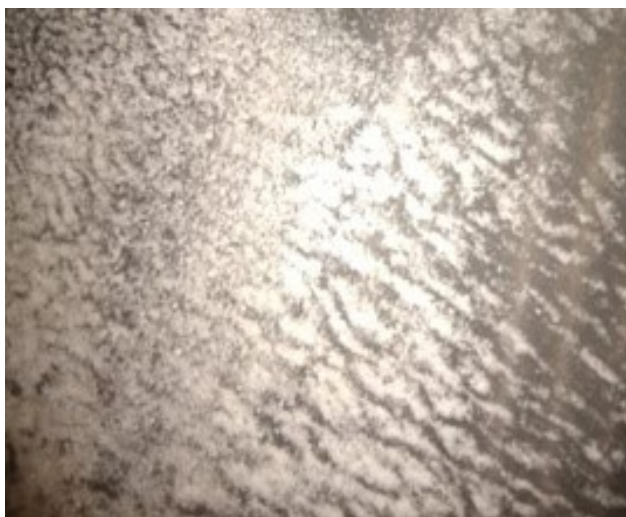

**Fig. S1:** Surface morphology of the coated solar cell with  $Eu^{3+}$ -  $Tb^{3+}$  activated/ co-activated  $K_2NaAlF_6$  phosphor has been synthesized by low temperature wet chemical method.

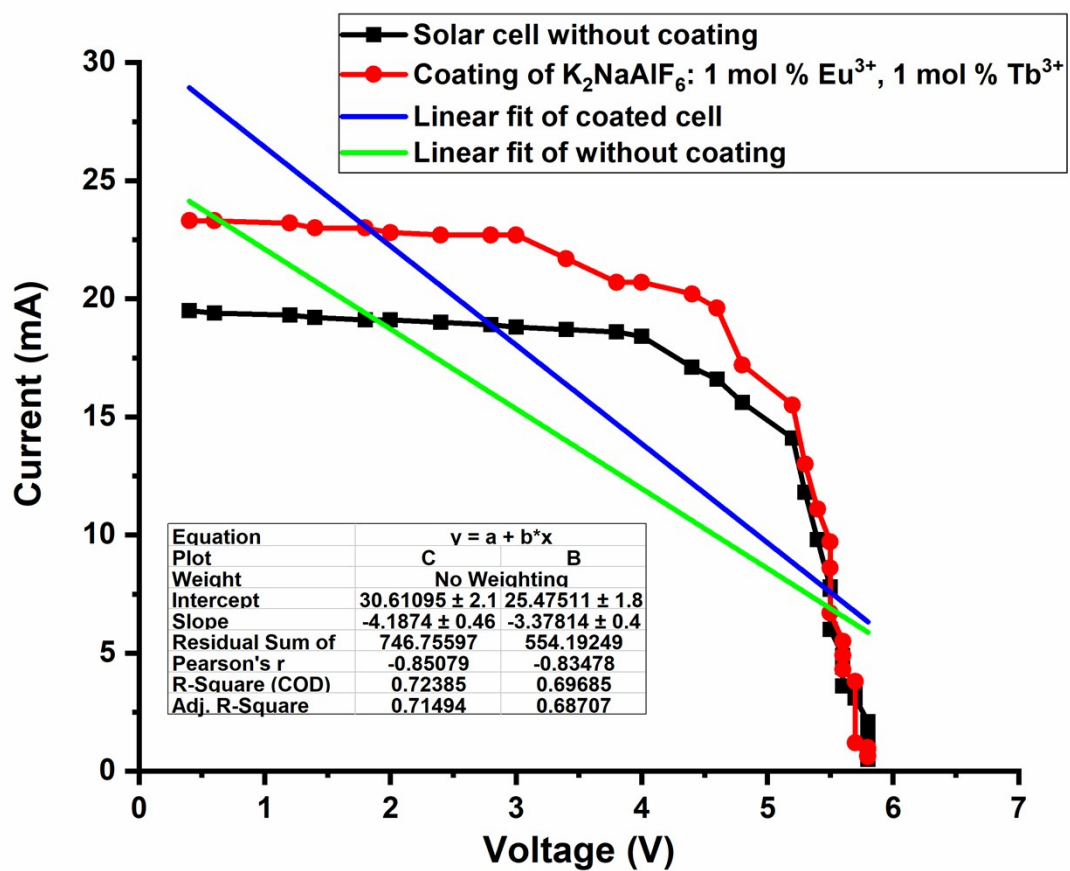

**Fig. S2:** IV characteristics of  $Eu^{3+}$  -  $Tb^{3+}$  co-activated  $K_2NaAlF_6$  phosphor under solar simulator.

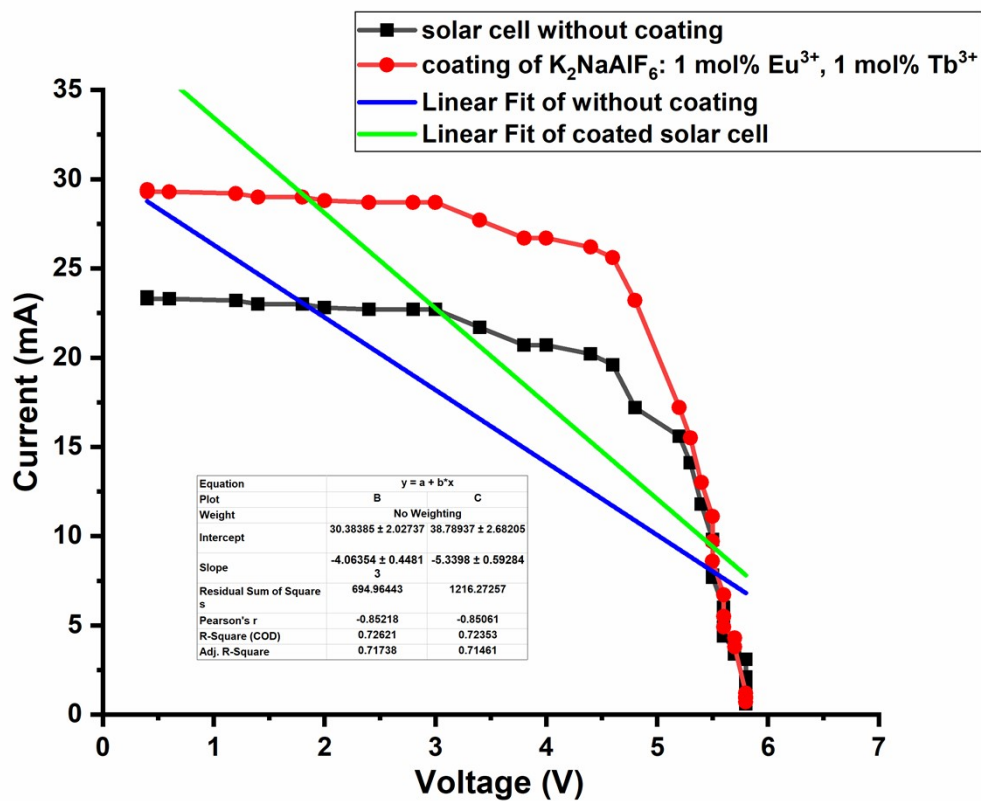

Fig. S3: IV characteristics of  $Eu^{3+}$  -  $Tb^{3+}$  co-activated  $K_2NaAlF_6$  phosphor under direct sunlight.
